# Supplementary material for: Facile Synthesis of Microsphere-like Co0.85Se Structures on Nickel Foam for a Highly Efficient Hydrogen Evolution Reaction
Source: MDPI journal article supplement (doi:10.3390/mi14101905), 2023-10-05
Supplement: s1 [file s1]

**Facile Synthesis of Microsphere-Like  $\text{Co}_{0.85}\text{Se}$  Structures on Nickel Foam for a Highly Efficient Hydrogen Evolution Reaction**

John Anthuvan Rajesh,<sup>1</sup> Jae-Young Kim,<sup>1</sup> Soon-Hyung Kang,<sup>2</sup> and Kwang-Soon Ahn<sup>1\*</sup>

<sup>a</sup>*School of Chemical Engineering, Yeungnam University, Gyeongsan 712-749, S. Korea*

<sup>b</sup>*Department of Chemistry Education, Chonnam National University, Gwangju 500-757, South Korea*

\*Corresponding author: E-mail address: kstheory@ynu.ac.kr;

Tel: +82-53-810-2524; Fax: +82-53-810-4631

**Figure S1**

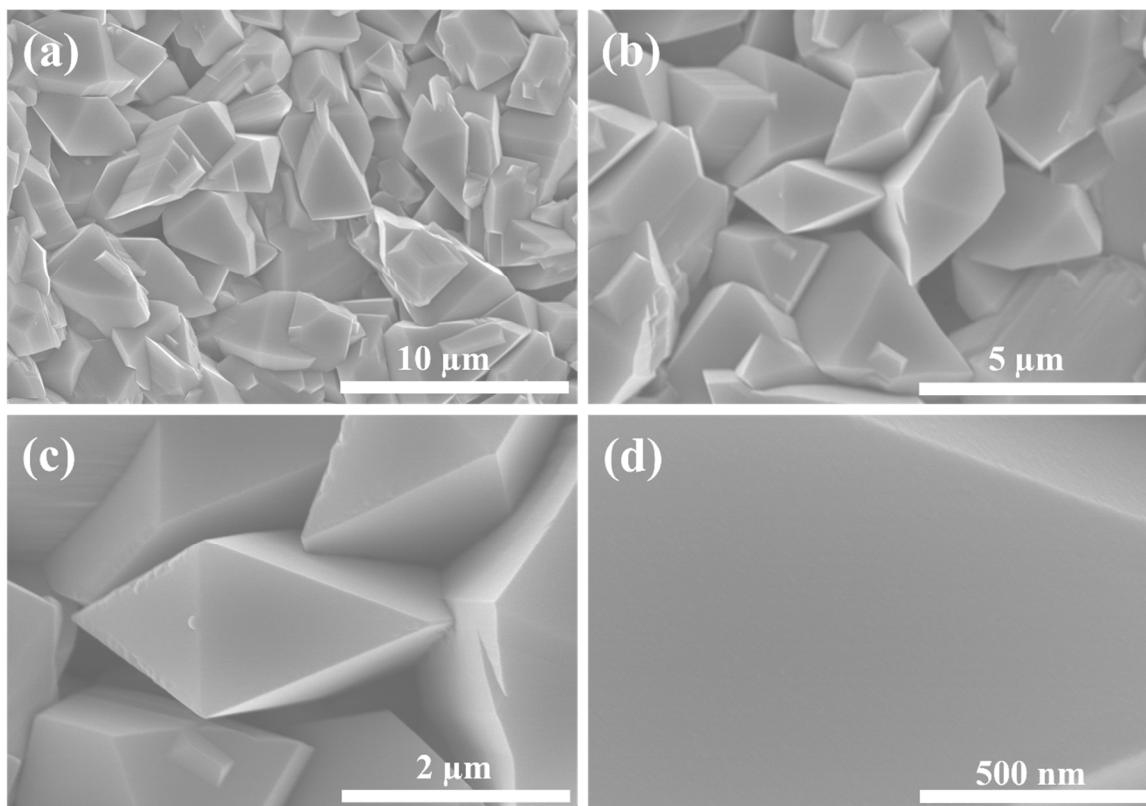

**Figure S1.** (a-d) FESEM images of Co(OH)F microcrystals at different magnifications.

**Figure S2**

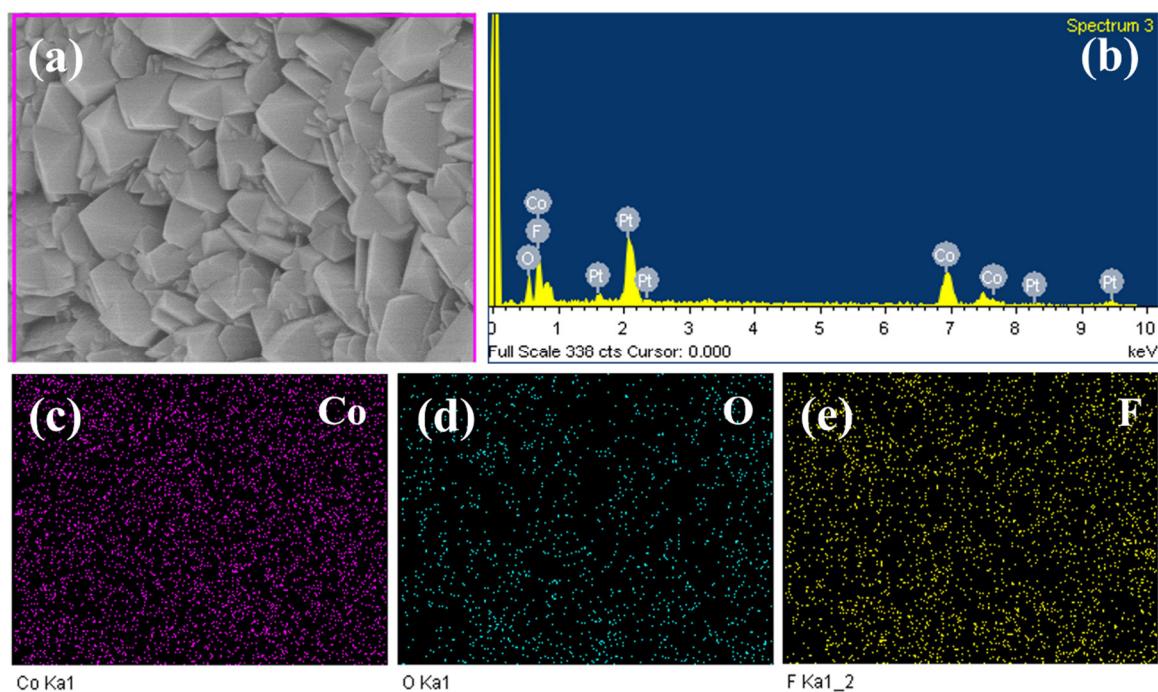

**Figure S2.** (a) FESEM electron image and (b) corresponding EDX spectrum of Co(OH)F microcrystals. EDX elemental maps of (c) cobalt, (d) oxygen, and (e) fluorine.

**Figure S3**

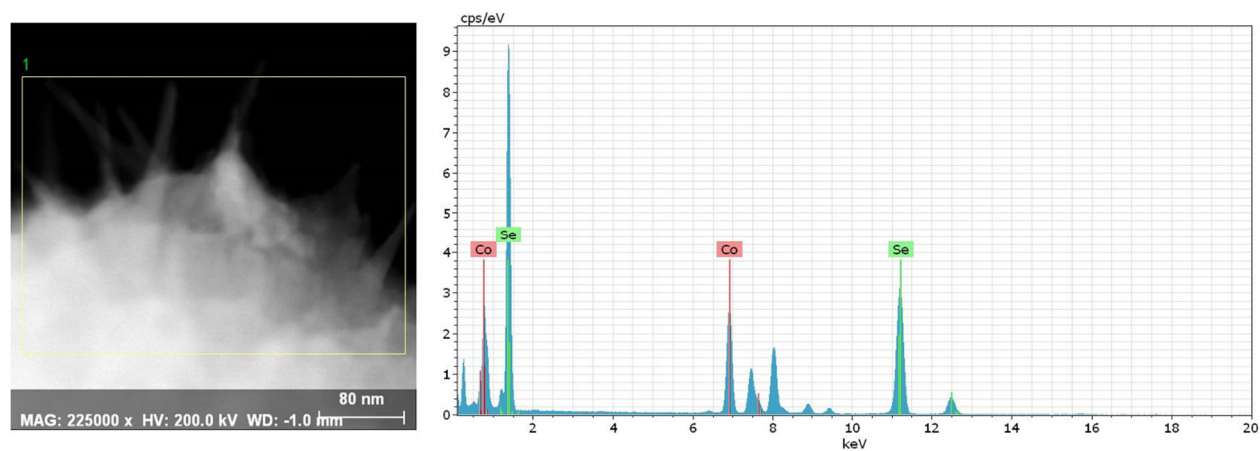

**Figure S3.** (a) HRTEM HAADF image and (b) corresponding EDX spectrum of the Co<sub>0.85</sub>Se.

**Figure S4**

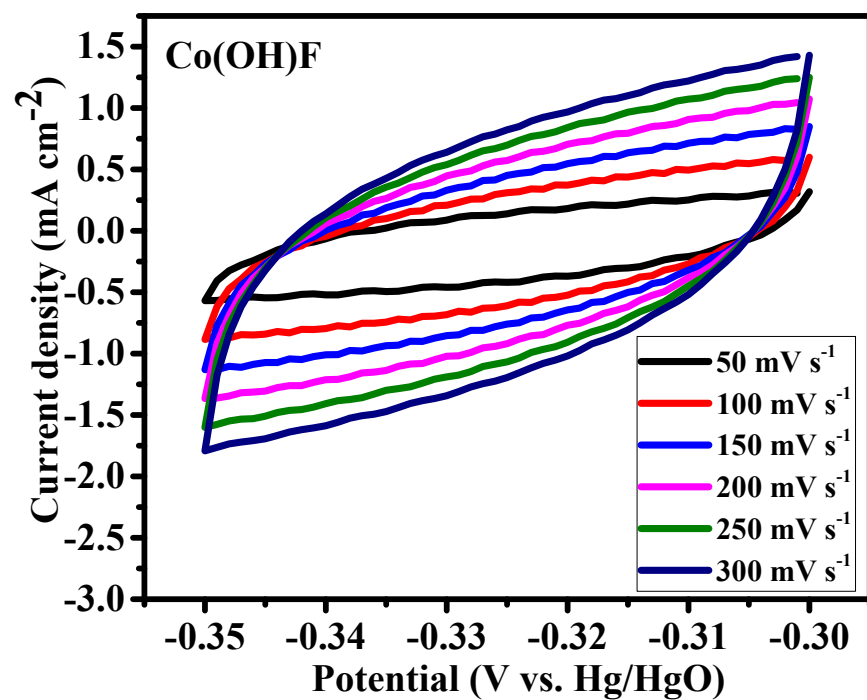

**Figure S4.** Typical CV curves at different scan rates in the non-Faradaic region for Co(OH)F electrocatalyst.
